# Supplementary material for: DIO1 Gene Polymorphism Is Associated with Thyroid Profiles and Reproductive Performance in Dairy Cows
Source: MDPI journal article supplement (doi:10.3390/agriculture13020398), 2023-02-08
Supplement: s1 [file s1]

**Table S1.** General linear model (GLM) with a binomial distribution—effects of polymorphic variants of the *DIO1* gene, thyroid hormones, and their interaction on the reproductive traits in dairy cows.

| Factor                        | <i>p</i> -values     |                                   |
|-------------------------------|----------------------|-----------------------------------|
|                               | The open days period | The first service conception rate |
| CG genotype                   | 0.066                | 0.046                             |
| GG genotype                   | > 0.1                | 0.081                             |
| T4 (2 weeks PrP)              | 0.038                | > 0.1                             |
| T3 (4 weeks PrP)              | > 0.1                | 0.095                             |
| T3 (7 weeks PP)               | 0.035                | > 0.1                             |
| T3 (13 weeks PP)              | > 0.1                | 0.049                             |
| rT3 (2 weeks PrP)             | 0.080                | 0.096                             |
| rT3 (7 weeks PP)              | 0.095                | > 0.1                             |
| T4/T3 (2 weeks PrP)           | 0.065                | > 0.1                             |
| T4/T3 (13 weeks PP)           | > 0.1                | 0.068                             |
| T3/rT3 (6 weeks PrP)          | 0.088                | > 0.1                             |
| T3/rT3 (2 weeks PrP)          | 0.074                | > 0.1                             |
| T3/rT3 (7 weeks PP)           | 0.051                | > 0.1                             |
| rT3 (2 weeks PrP)xCG genotype | 0.060                | > 0.1                             |

Abbreviations: prepartum (PrP), postpartum (PP).

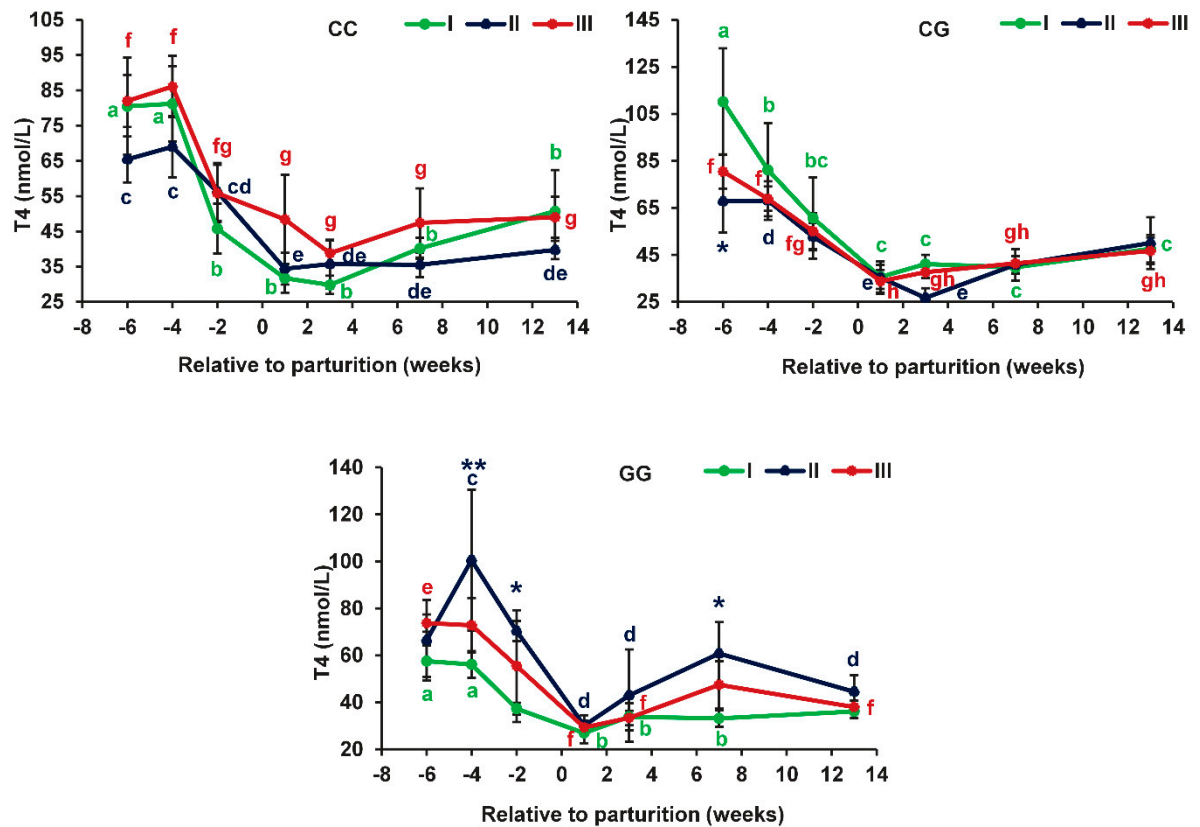

**Figure S1.** Serum total thyroxine (T4) concentrations during the prepartum and postpartum periods in dairy cows with different polymorphic variants of the *DIO1* gene in relation to the period of recovery of the ovarian luteal activity: < 7 weeks after calving (I); 7-13 weeks after calving (II); > 13 weeks after calving (III). Means with different letters differ significantly within each group (at least  $p < 0.05$ ). \* $p < 0.05$ , \*\* $p < 0.01$  (compared to group I).

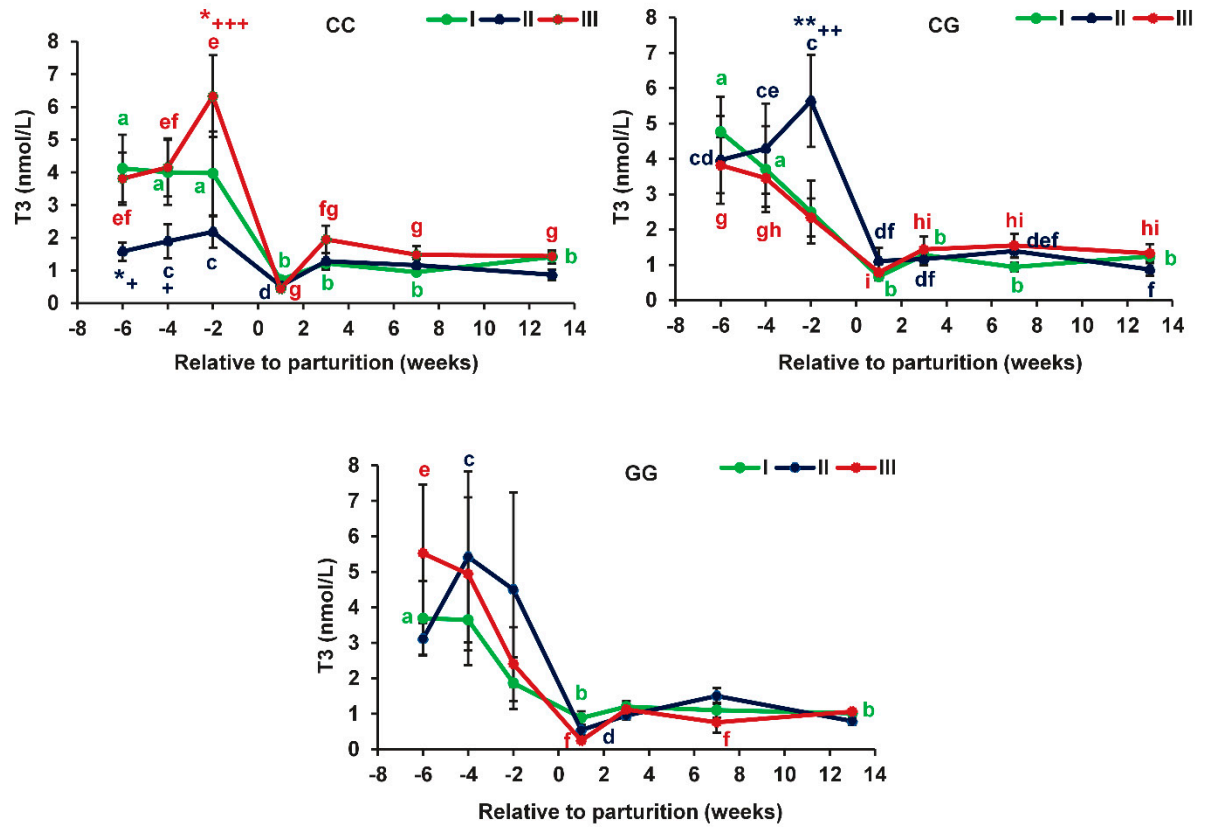

**Figure S2.** Serum total triiodothyronine (T3) concentrations during the prepartum and postpartum periods in dairy cows with different polymorphic variants of the *DIO1* gene in relation to the period of recovery of the ovarian luteal activity: < 7 weeks after calving (I); 7-13 weeks after calving (II); > 13 weeks after calving (III). Means with different letters differ significantly within each group (at least  $p < 0.05$ ). \* $p < 0.05$ , \*\* $p < 0.01$  (compared to group I); + $p < 0.05$ , ++ $p < 0.01$ , +++ $p < 0.001$  (between groups II and III).

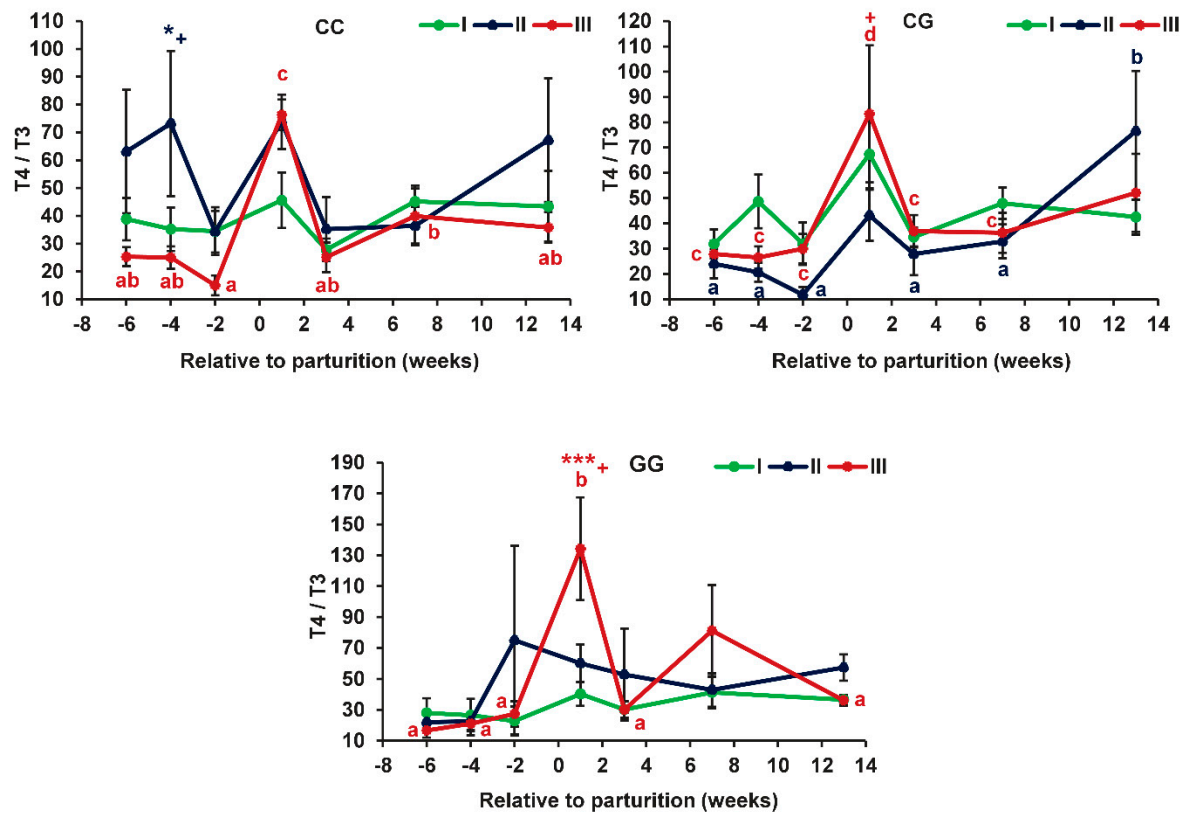

**Figure S3.** Total thyroxine to total triiodothyronine ratio (T4/T3) during the prepartum and postpartum periods in dairy cows with different polymorphic variants of the *DIO1* gene in relation to the period of recovery of the ovarian luteal activity: < 7 weeks after calving (I); 7-13 weeks after calving (II); > 13 weeks after calving (III). Means with different letters differ significantly within each group (at least  $p < 0.05$ ). \* $p < 0.05$ , \*\*\* $p < 0.001$  (compared to group I); + $p < 0.05$  (between groups II and III).

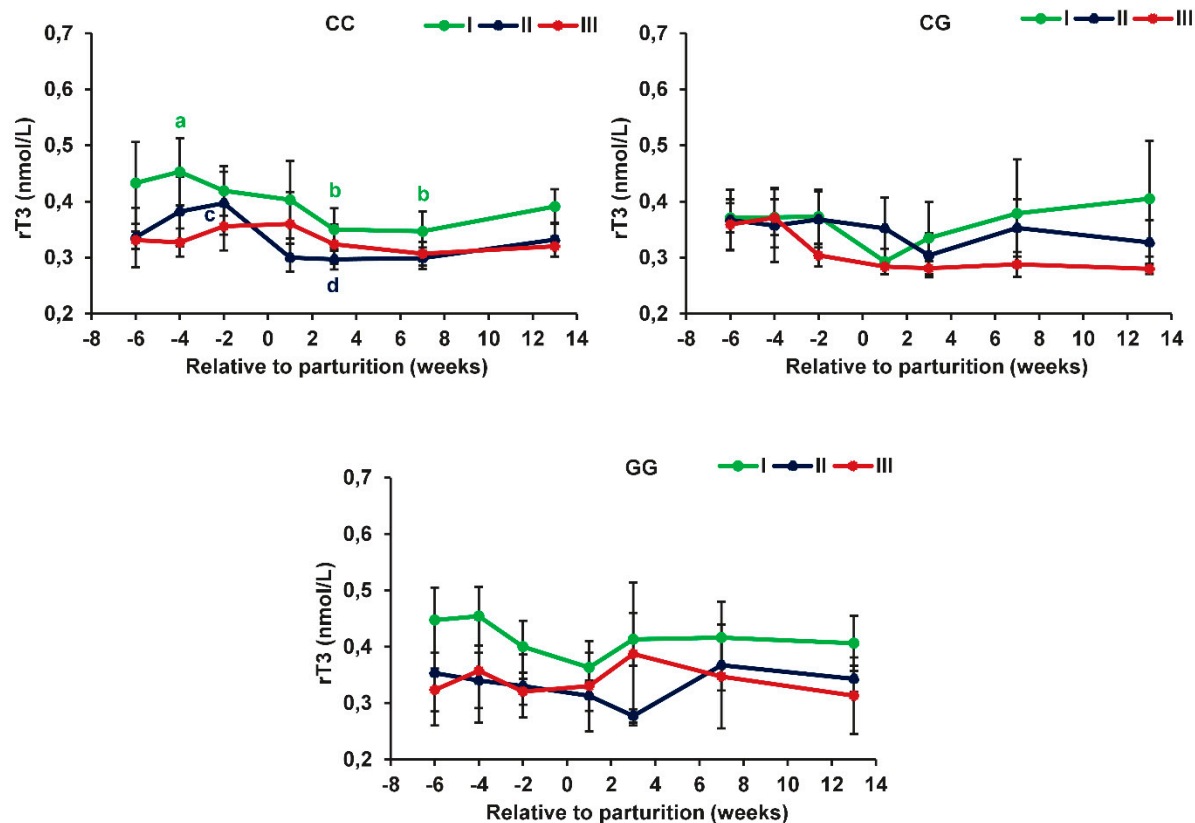

**Figure S4.** Serum reverse triiodothyronine (rT3) concentrations during the prepartum and postpartum periods in dairy cows with different polymorphic variants of the *DIO1* gene in relation to the period of recovery of the ovarian luteal activity: < 7 weeks after calving (I); 7-13 weeks after calving (II); > 13 weeks after calving (III). Means with different letters differ significantly within each group (at least  $p < 0.05$ ).

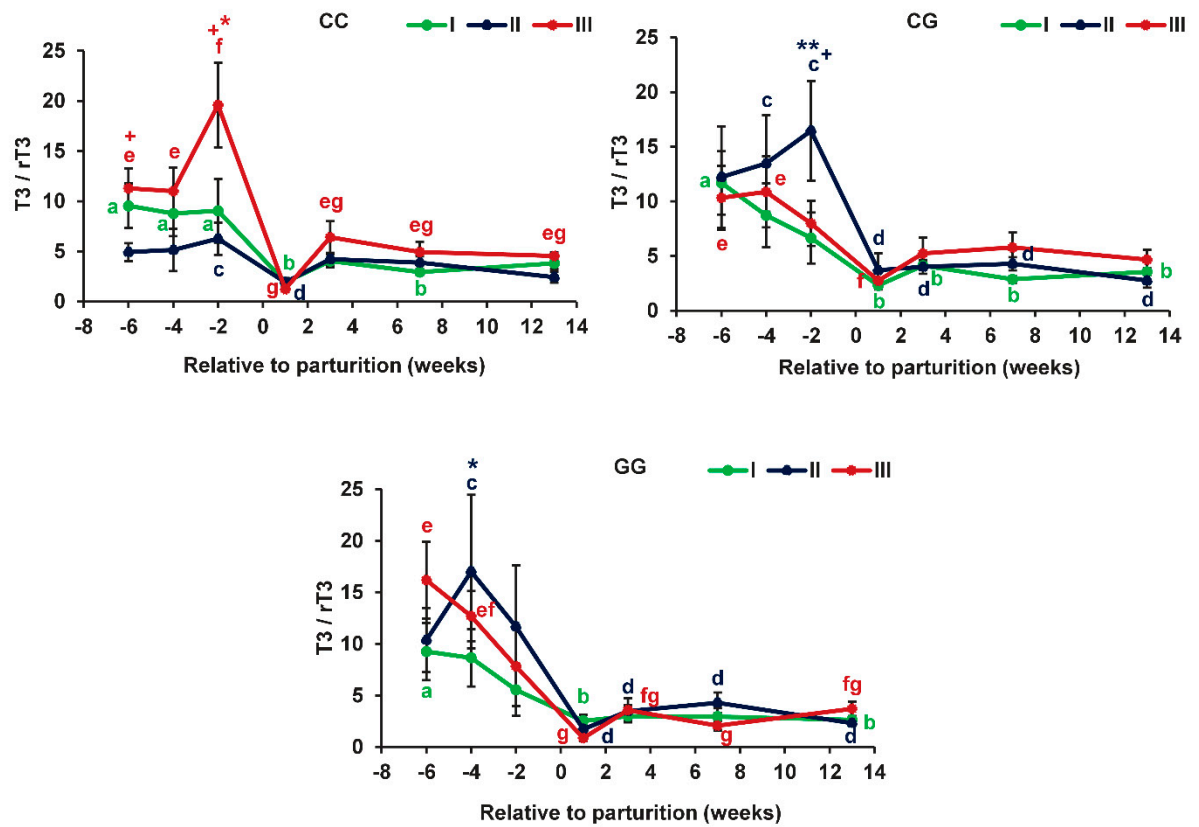

**Figure S5.** Total triiodothyronine to reverse triiodothyronine ratio (T3/rT3) during the prepartum and postpartum periods in dairy cows with different polymorphic variants of the *DIO1* gene in relation to the period of recovery of the ovarian luteal activity: < 7 weeks after calving (I); 7-13 weeks after calving (II); > 13 weeks after calving (III). Means with different letters differ significantly within each group (at least  $p < 0.05$ ). \* $p < 0.05$ , \*\* $p < 0.01$  (compared to group I); <sup>+</sup> $p < 0.05$  (between groups II and III).

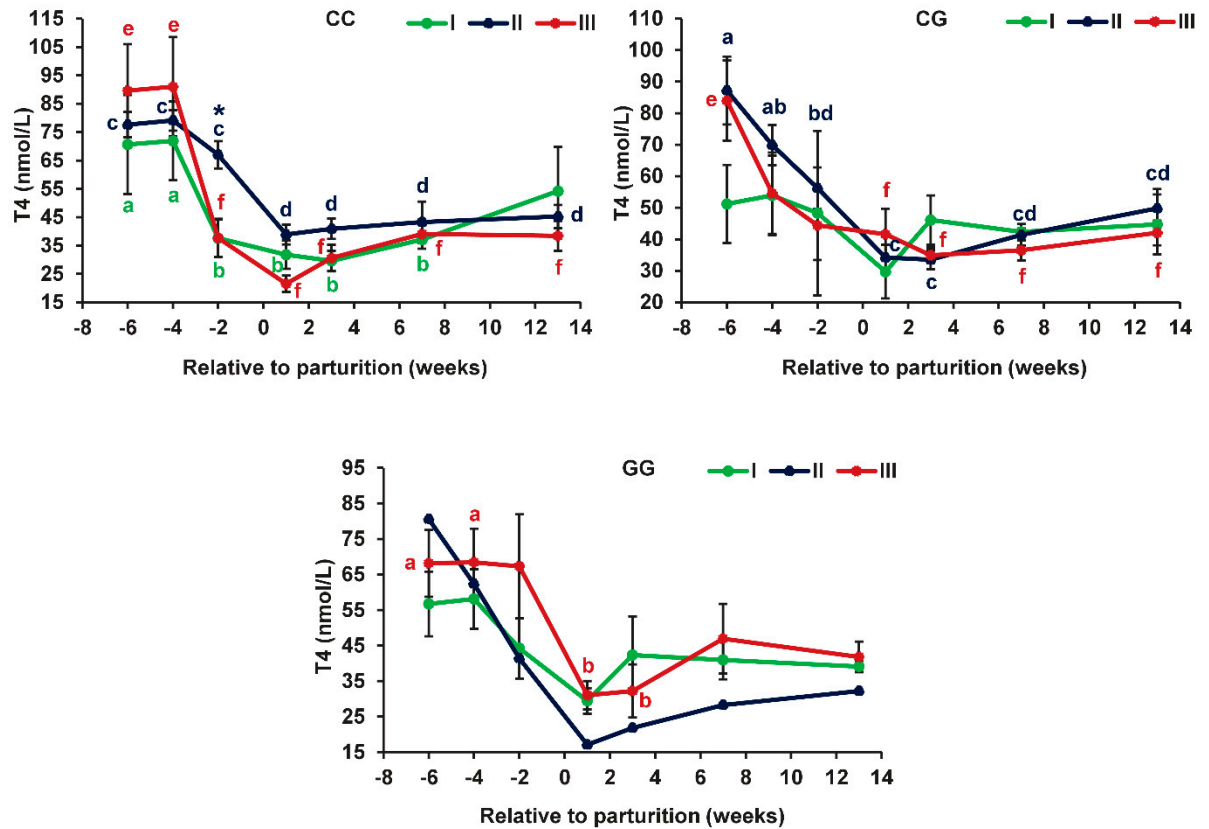

**Figure S6.** Serum total thyroxine (T4) concentrations during the prepartum and postpartum periods in dairy cows with different polymorphic variants of the *DIO1* gene in relation to the open days period: < 120 days (I); 120-240 days (II); 240-370 days (III). Means with different letters differ significantly within each group (at least  $p < 0.05$ ). \* $p < 0.05$  (compared to group I).

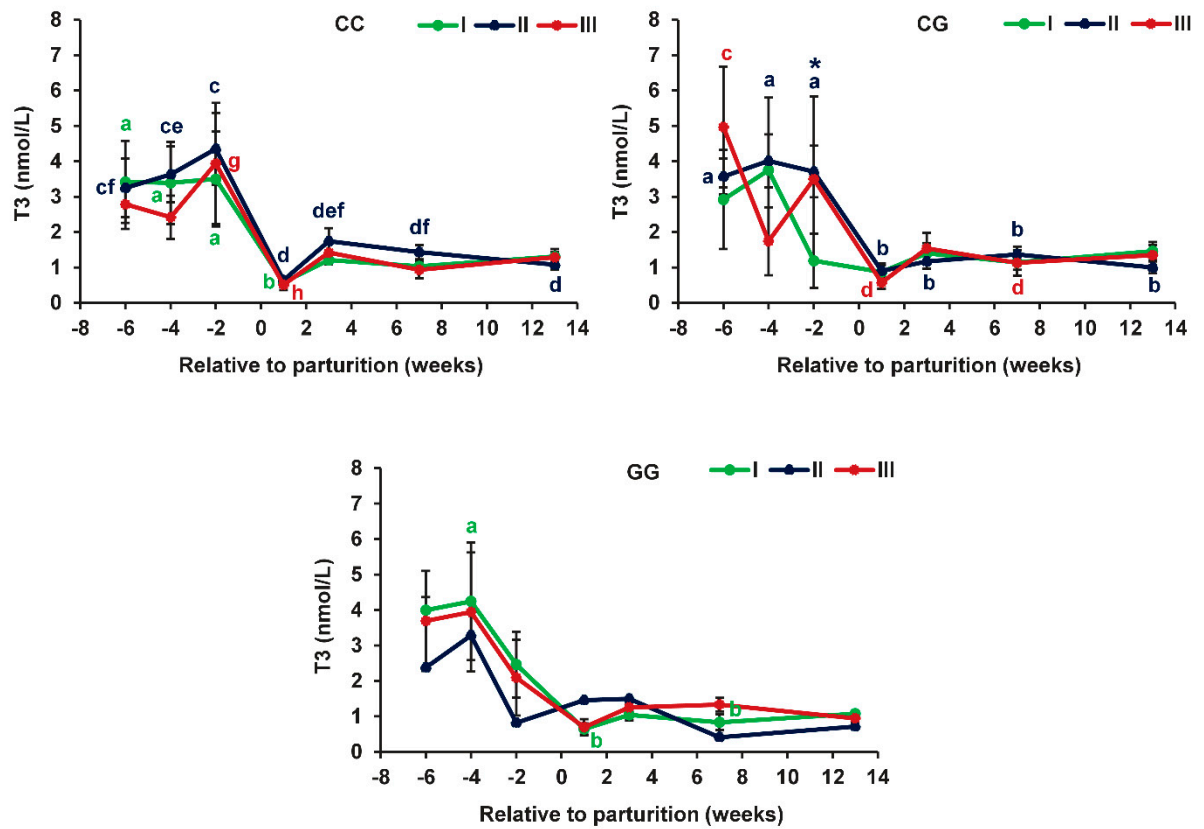

**Figure S7.** Serum total triiodothyronine (T3) concentrations during the prepartum and postpartum periods in dairy cows with different polymorphic variants of the *DIO1* gene in relation to the open days period: < 120 days (I); 120-240 days (II); 240-370 days (III). Means with different letters differ significantly within each group (at least  $p < 0.05$ ). \* $p < 0.05$  (compared to group I).



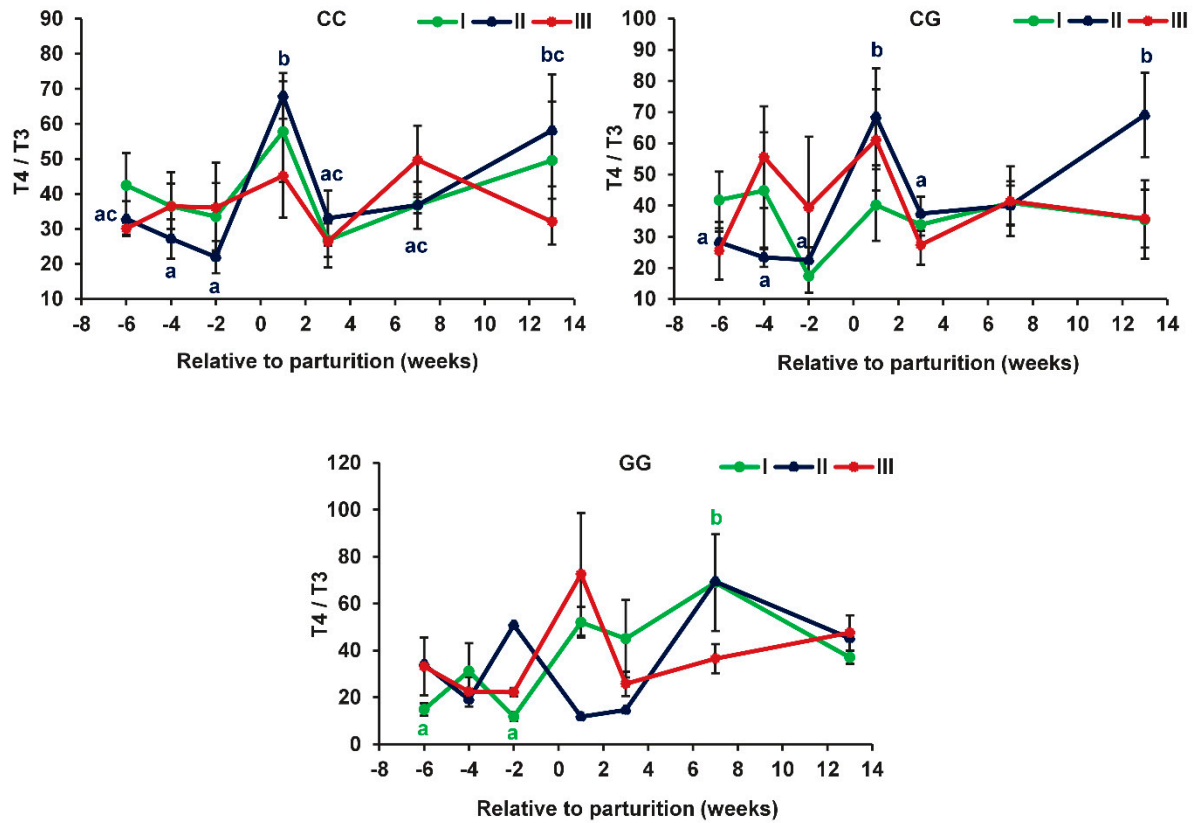

**Figure S8.** Total thyroxine to total triiodothyronine ratio (T4/T3) during the prepartum and postpartum periods in dairy cows with different polymorphic variants of the *DIO1* gene in relation to the open days period: < 120 days (I); 120-240 days (II); 240-370 days (III). Means with different letters differ significantly within each group (at least  $p < 0.05$ ).

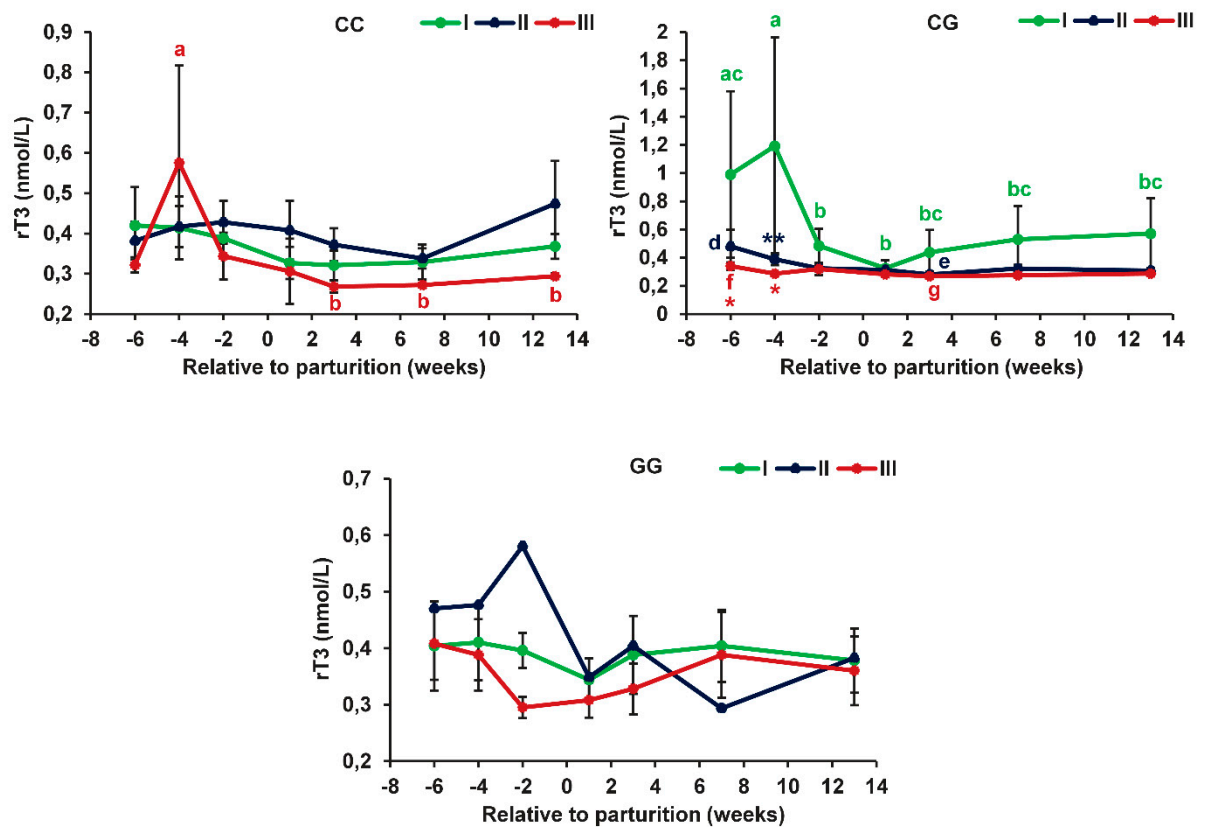

**Figure S9.** Serum reverse triiodothyronine (rT3) concentrations during the prepartum and postpartum periods in dairy cows with different polymorphic variants of the *DIO1* gene in relation to the open days period: < 120 days (I); 120-240 days (II); 240-370 days (III). Means with different letters differ significantly within each group (at least  $p < 0.05$ ). \* $p < 0.05$ , \*\* $p < 0.01$  (compared to group I).

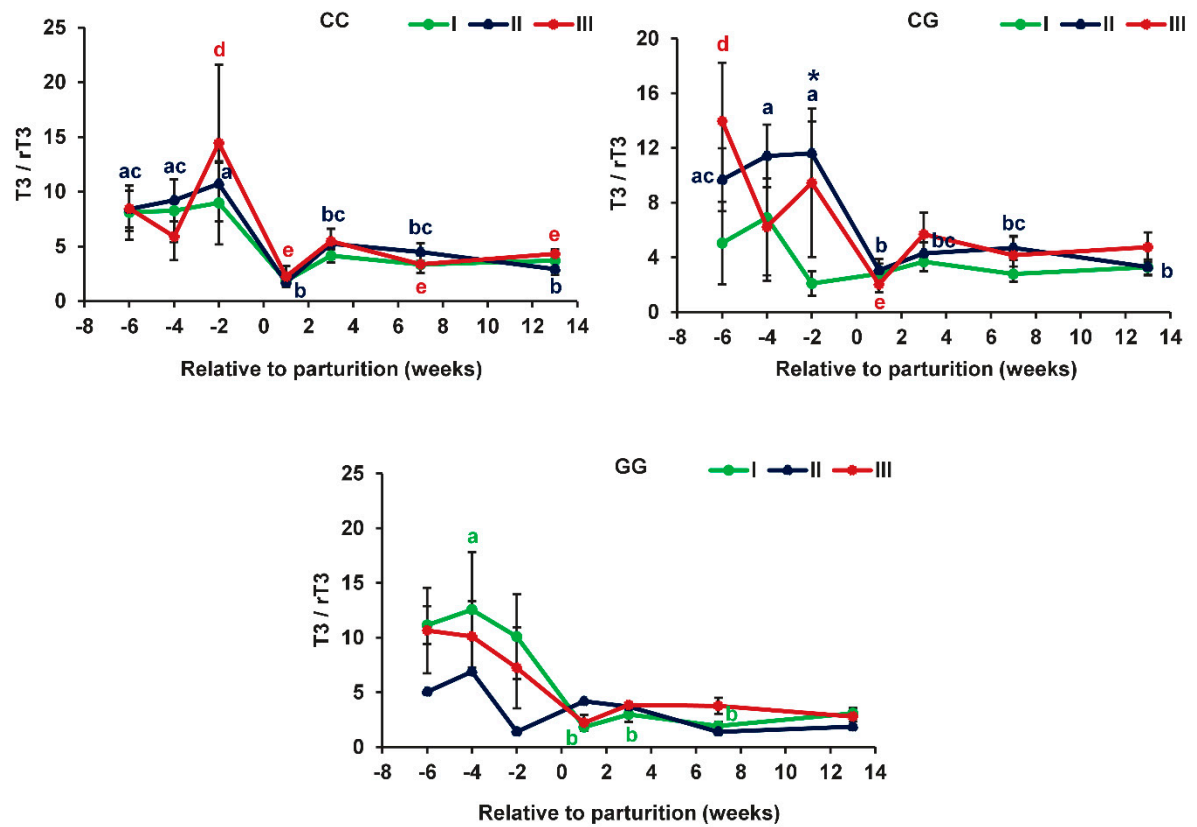

**Figure S10.** Total triiodothyronine to reverse triiodothyronine ratio (T3/rT3) during the prepartum and postpartum periods in dairy cows with different polymorphic variants of the *DIO1* gene in relation to the open days period: < 120 days (I); 120-240 days (II); 240-370 days (III). Means with different letters differ significantly within each group (at least  $p < 0.05$ ). \* $p < 0.05$  (compared to group I).
