# Supplementary material for: DIO1 Gene Polymorphism Is Associated with Thyroid Profiles and Reproductive Performance in Dairy Cows
Source: MDPI journal article supplement (doi:10.3390/agriculture13020398), 2023-02-08
Supplement: s1 [file s1]

Archive with 1 entries (1 files):
- agriculture-2103881-supplementary.pdf
